# Supplementary material for: Role of block copolymer adsorption versus bimodal grafting on nanoparticle self-assembly in polymer nanocomposites
Source: Royal Society of Chemistry journal article supplement (doi:10.1039/c6sm01396a), 2016-01-01
Supplement: c6sm01396a1.pdf [file c6sm01396a1.pdf]

## **Electronic Supporting Information**

### **Role of block copolymer adsorption versus bimodal grafting on nanoparticle self-assembly in polymer nanocomposites**

*Dan Zhao<sup>a</sup>, Matteo Di Nicola<sup>b</sup>, Mohammad M. Khani<sup>c</sup>, Jacques Jestin<sup>a,d</sup>, Brian C. Benicewicz<sup>c</sup>, and Sanat K. Kumar<sup>\*a</sup>*

<sup>a</sup>Department of Chemical Engineering, Columbia University, 500 West 120th Street, New York, New York 10027, United States

<sup>b</sup>School of Science and Technology, Università di Camerino, Via Sant'Agostino 1, 62032, Camerino, Italy

<sup>c</sup>Department of Chemistry and Biochemistry, University of South Carolina, Columbia, South Carolina 29208, United States

<sup>d</sup>Laboratoire Léon Brillouin, CEA Saclay, 91191 Gif-sur-Yvette Cedex, France

\*Address correspondence to [sk2794@columbia.edu](mailto:sk2794@columbia.edu)

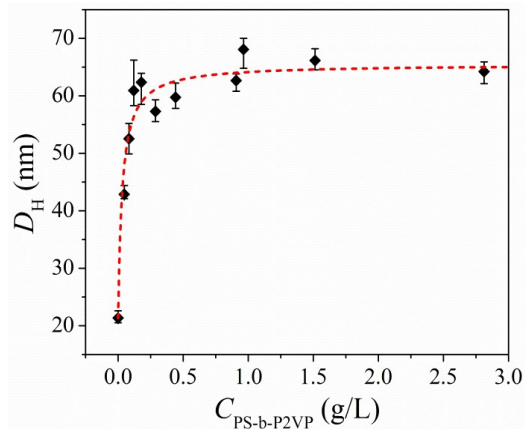

**Figure S1.** The apparent hydrodynamic diameter ( $D_H$ ) of silica/PS-b-P2VP (110-b-12.5) dispersions as a function of PS-b-P2VP concentration ( $C_{PS-b-P2VP}$ ). The dashed red line is a guide for the eye. Note that the saturation adsorption yields a grafting density of  $\sim 0.01$  chains/nm<sup>2</sup>.

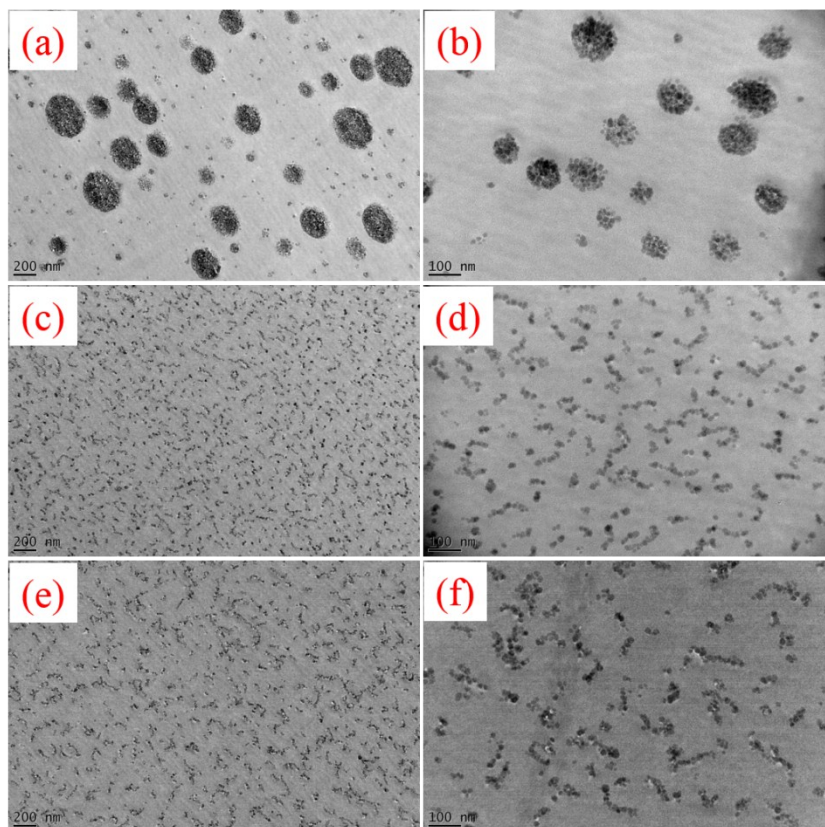

**Figure S2.** TEM micrographs for (a), (b) bare silica NPs in a 592 kg mol<sup>-1</sup> PS matrix; (c), (d) silica NPs fully adsorbed with 110-b-12.5 BCPs in a 106 kg mol<sup>-1</sup> matrix; (e), (f) silica NPs fully adsorbed with 110-b-12.5 BCPs in a 592 kg mol<sup>-1</sup> PS matrix. The images on the left column were photographed at a low magnification (40k) while the ones on the right column were obtained at a high magnification (110k).

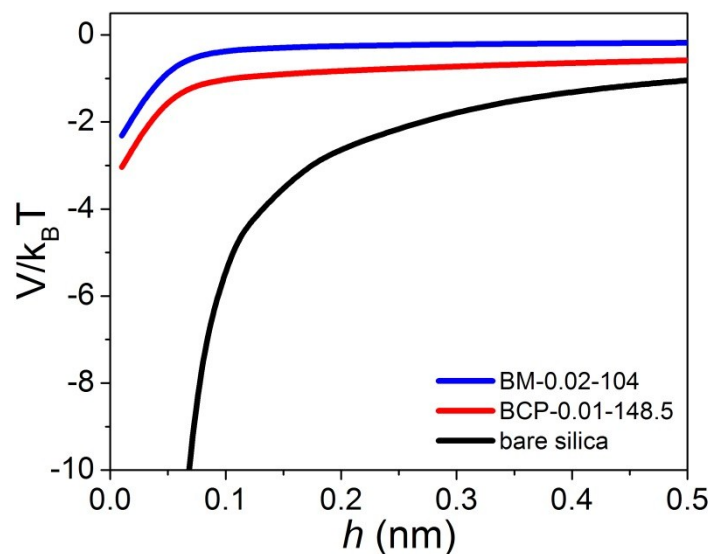

**Figure S3.** Van der Waals attraction potential ( $V/k_B T$ ) as a function of the inter-particle separation ( $h$ ) for bare (black), BCP-0.01-148.5 (red) and BM-0.02-104 (blue) silica NPs. Note that, for these calculations, we assume the P2VP chains are fully collapsed onto the silica surface.

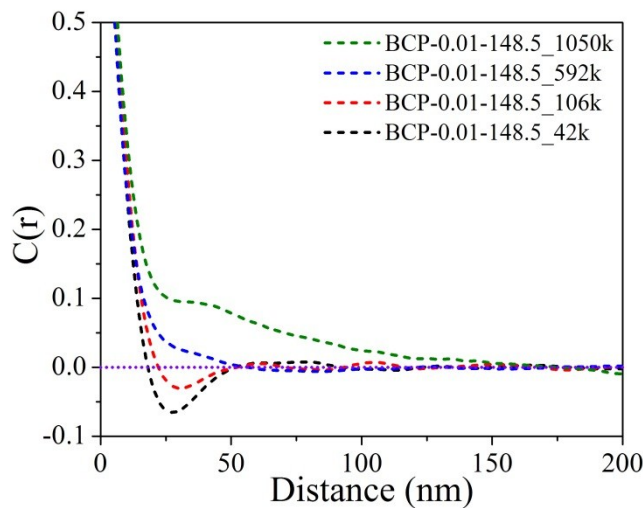

**Figure S4.** Pixel-pixel autocorrelation function  $C(r)$  as a function of distance for TEM images of BCP (148.5-b-19) coated silica NPs in PS matrices with varying molecular weights, as indicated inside the graph.

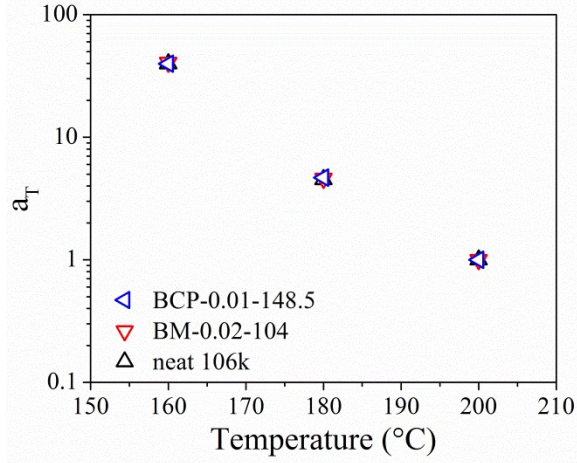

**Figure S5.** Time-temperature superposition shift factor as a function of temperature for neat 106 kg mol<sup>-1</sup> PS melts as well as those filled with 5 wt % bimodal grafted or BCP adsorbed silica NPs. The reference temperature is 200 °C.

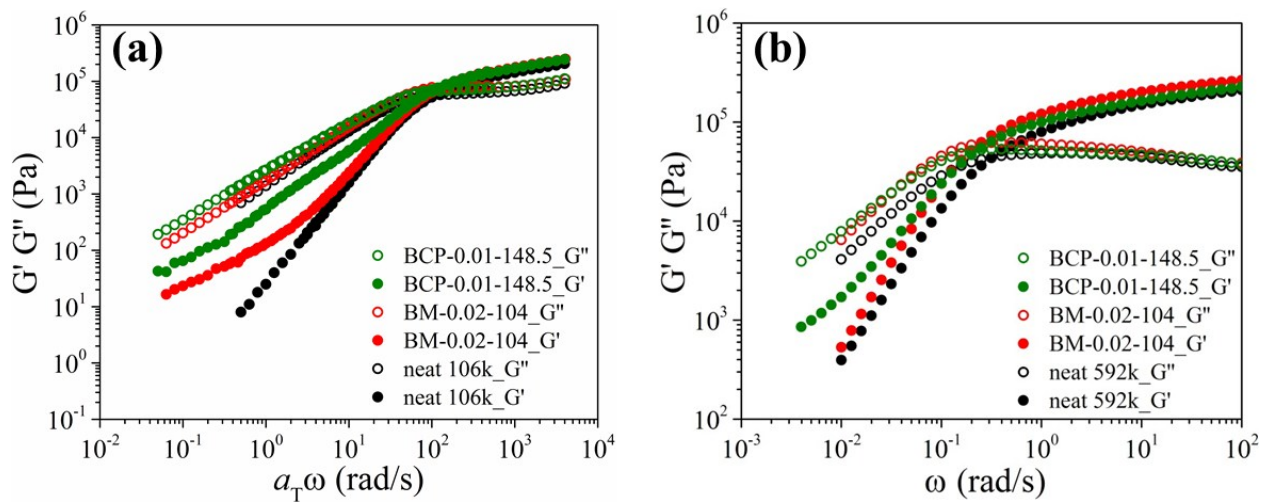

**Figure S6.** The storage ( $G'$ , closed symbols) and loss ( $G''$ , open symbols) modulus as a function of angular frequency for (a) 106 kg mol<sup>-1</sup> and (b) 592 kg mol<sup>-1</sup> PS melts as well as their corresponding nanocomposites, as indicated inside the graphs. The reference temperature for (a) is 200 °C with the shift factors  $a_T$  shown in Figure S5. All the datapoints in (b) were collected at 200 °C. Also note that the nanocomposites have a silica core loading of 5 wt % and had been annealed for 5 days at 150 °C under vacuum before rheological tests.

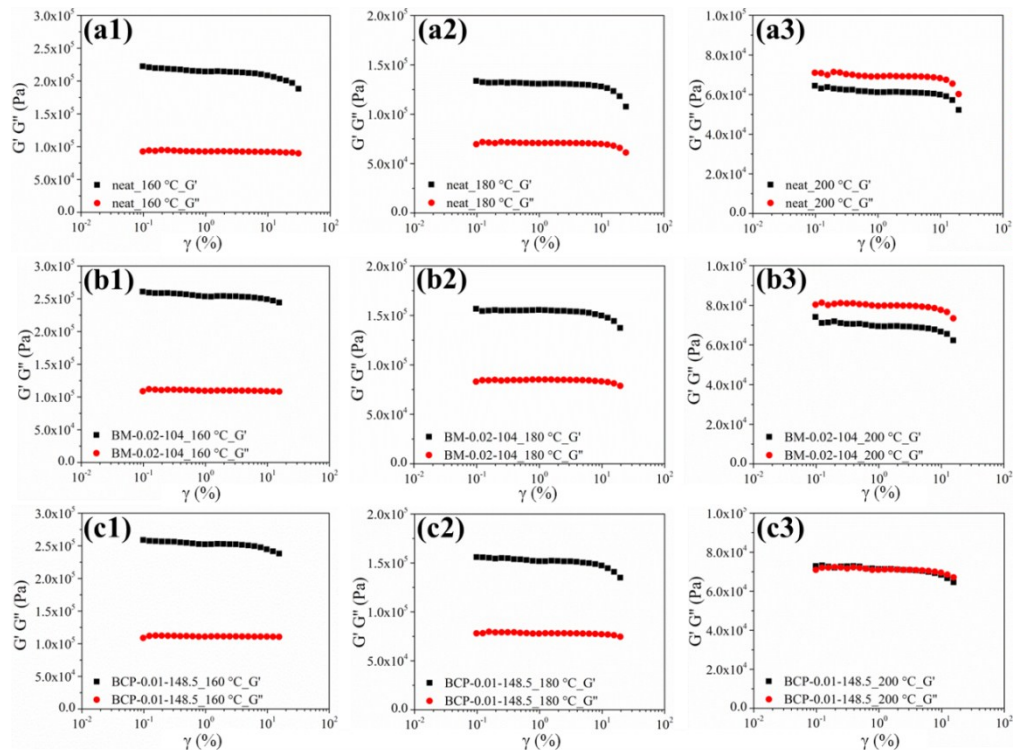

**Figure S7.** Strain sweep results for (a1-a3) 106 kg mol<sup>-1</sup> PS melts as well as those filled with 5 wt % (b1-b3) bimodal BM-0.02-104, and (c1-c3) BCP-0.01-148.5 silica NPs. All the measurements were conducted at an angular frequency of 100 rad s<sup>-1</sup>. The temperature used for each experiment is indicated inside the figure.

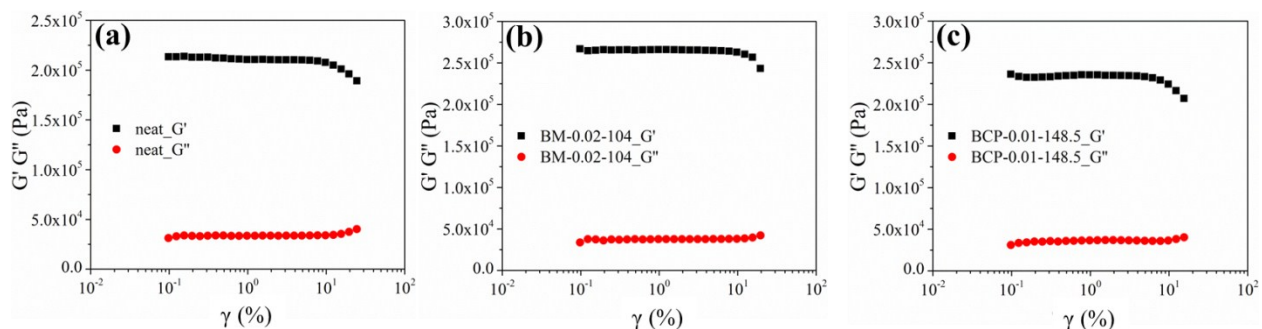

**Figure S8.** Strain sweep results for (a) 592 kg mol<sup>-1</sup> PS melts as well as those filled with 5 wt % (b) bimodal BM-0.02-104, and (c) BCP-0.01-148.5 silica NPs. All the measurements were conducted at an angular frequency of 100 rad s<sup>-1</sup> at 200 °C.
